# Supplementary material for: Effect of rapid thermal annealing on crystallization and stress relaxation of SiGe nanoparticles deposited by ICP PECVD
Source: Royal Society of Chemistry journal article supplement (doi:10.1039/c7ra04426g), 2017-01-01
Supplement: c7ra04426g1.pdf [file c7ra04426g1.pdf]

Supporting information for

**Effect of rapid thermal annealing on crystallization and stress relaxation of  
 $\text{Si}_x\text{Ge}_{1-x}$  particles deposited by ICP PECVD**

*Florent Ravoux, Nitul S. Rajput, Jehad Abed, Leslie George, Mike Tiner, Mustapha Jouiad\**

Department of Mechanical and Materials Engineering, Masdar Institute of Science and  
Technology, Masdar City, Abu Dhabi, UAE.

**Porosity measurement**

The porosity of all samples was measured using scanning electron microscopy. The images were captured with energy of 5 kV, a current of 0.1 nA and a magnification of 5000X. For each sample, a total surface of 3000  $\mu\text{m}^2$  was analyzed using contrast threshold enhancement technique to distinguish the SiGe nanoparticles from the substrate. To further increase the precision of the measurement, a watershed algorithm was used to split agglomerated nanoparticles. Finally, a particles determination algorithm (ImageJ <sup>TM</sup> software) was used to determine the total surface covered by SiGe nanoparticles (cf. figure S1). The measured porosities are 34.939%, 23.423%, 24.734%, 22.682% and 19.791%, respectively for as-deposited and annealed sample 450°C for 10 minutes, 450°C for 30 minutes, 600°C for 10 minutes and 600°C for 30 minutes.

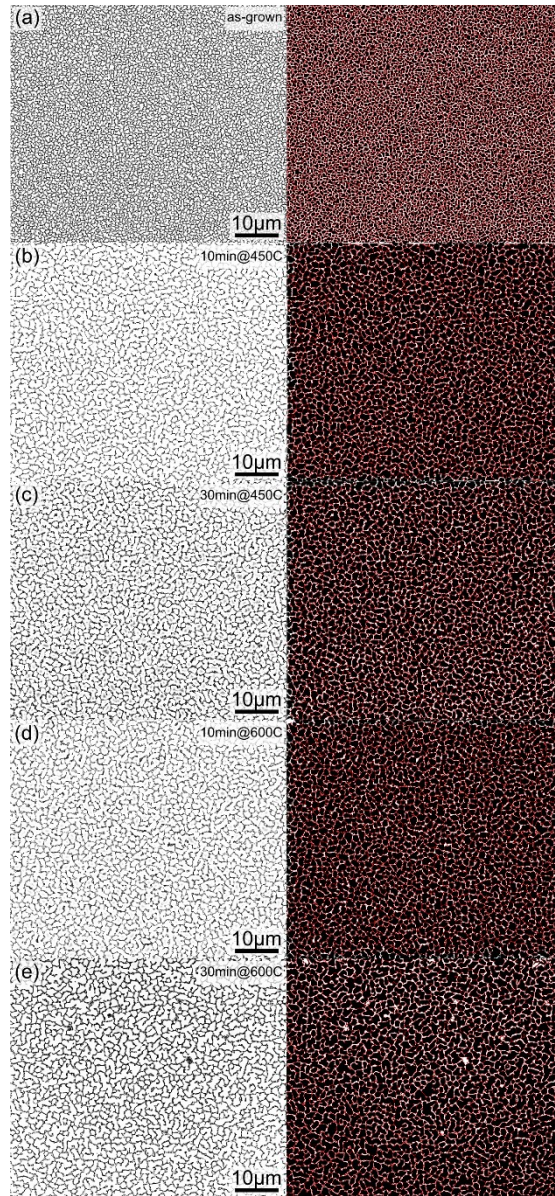

**FIG. S1.** SEM images of SiGe nanoparticles (left) and processed images (right) for porosity measurement using threshold enhancement and watershed algorithm for (a) as deposited sample, (b) sample annealed at 450°C during 10 minutes, (c) sample annealed at 450°C during 30 minutes, (d) sample annealed at 600°C during 10 minutes and (e) sample annealed at 600°C during 30 minutes.
